# Supplementary material for: A Serum-Induced Transcriptome and Serum Cytokine Signature Obtained at Diagnosis Correlates with the Development of Early Pancreatic Ductal Adenocarcinoma Metastasis
Source: Oxford University Press journal article supplement (doi:10.1158/1055-9965.epi-18-0813), 2018-12-07
Supplement: 10559965epi180813-sup-205592_2_supp_5152609_phvs3z.docx [file 10559965epi180813-sup-205592_2_supp_5152609_phvs3z.docx]

| Supplementary Table 1. Ontological Analysis n=727 | | | | | |
| --- | --- | --- | --- | --- | --- |
| IPA | | | | DAVID | |
| Top Canonical Pathways | p-value | Top Diseases and Biofunctions | p-value range | Top Pathways: Functional Annotation Chart | p-value |
| Pathogenesis of Multiple Sclerosis | 2.94E-04 | Cancer | 1.67E-03 – 4.85E-09 | Cytokine*** | 5.6E-06 |
| Granulocyte Adhesion and Diapedesis | 1.14E-03 | Organismal Injury and Abnormalities | 1.67E-03 – 4.85E-09 | Cytokine-Cytokine Receptor Interaction*** | 4.5E-05 |
| Role of IL-17A in Psoriasis | 1.47E-03 | Inflammatory Response*** | 1.67E-03 – 5.14E-09 | Ubl Conjugation | 1.2E-04 |
| Macropinocytosis Signaling | 4.03E-03 | Gastrointestinal Disease | 1.67E-03 – 5.62E-07 | Cell-Cell Signaling | 1.2E-04 |
| Role of Hypercytokinemia/  Hyperchemokinemia in the Pathogenesis of Influenza | 4.09E-03 | Connective Tissue  Disorders | 1.16E-03 – 5.79E-07 | Inflammatory Response*** | 1.3E-04 |
| *Contains transcripts included in the inflammatory transcriptome | | | | | |
