# Supplementary material for: A Serum-Induced Transcriptome and Serum Cytokine Signature Obtained at Diagnosis Correlates with the Development of Early Pancreatic Ductal Adenocarcinoma Metastasis
Source: Oxford University Press journal article supplement (doi:10.1158/1055-9965.epi-18-0813), 2018-12-07
Supplement: 10559965epi180813-sup-205592_2_supp_5152610_phvs3z.docx [file 10559965epi180813-sup-205592_2_supp_5152610_phvs3z.docx]

| Supplementary Table 2.  Pearson correlation of cytokines with the transcriptome index | | |
| --- | --- | --- |
|  | R2 | P value  (two-tailed) |
| Cytokine Index | 0.452 | 0.0332 |
| IL1α | 0.0560 | 0.5101 |
| IL1β | 0.1014 | 0.3698 |
| IL6 | 0.1978 | 0.1978 |
| IL17A | 0.1996 | 0.1995 |
| IL28A | 0.2131 | 0.1792 |
| IFNA2 | 0.212 | 0.1806 |
| IFNγ | 0.2152 | 0.1769 |
| TNFα | 0.1554 | 0.2596 |
| IL4 | 0.169 | 0.2379 |
| IL10 | 0.07839 | 0.4333 |
| IL13 | 0.1471 | 0.2739 |
| G-CSF | 0.00049 | 0.9516 |
| GM-CSF | 0.07942 | 0.4302 |
| FLT3L | 0.2445 | 0.1463 |
